# Supplementary material
Source: Springer Nature journal article supplement (https://www.springermedizin.de/resource/supplementary/12882_2014_782_MOESM1_ESM.pdf/9454702)

a

IgA

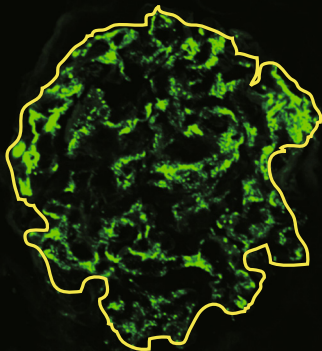

b

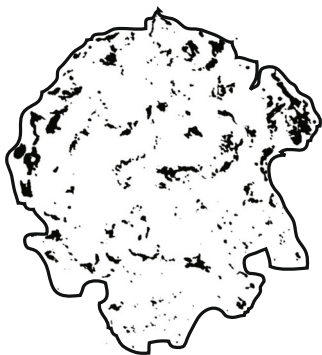

Area-IgA (%) = 9.8

Supplement: MOESM1 [file 9454702]
